# Supplementary material for: Microarray Genotyping Identifies New Loci Associated with Dementia in Parkinson’s Disease
Source: MDPI journal article supplement (doi:10.3390/genes12121975), 2021-12-10
Supplement: s1 [file s1]

## Supplementary Materials

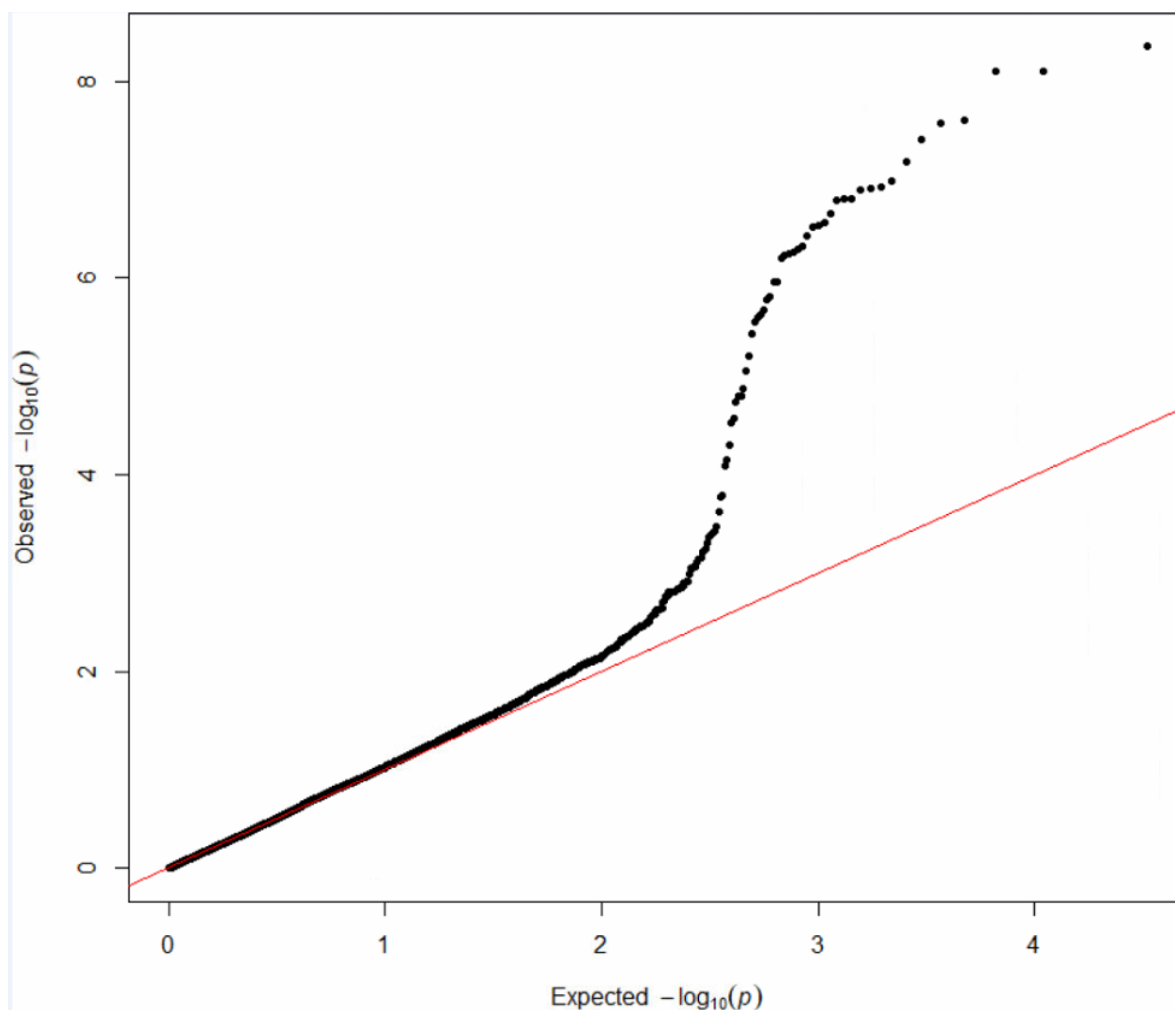

**Figure S1.** Quantile–quantile plot for Parkinson’s disease.

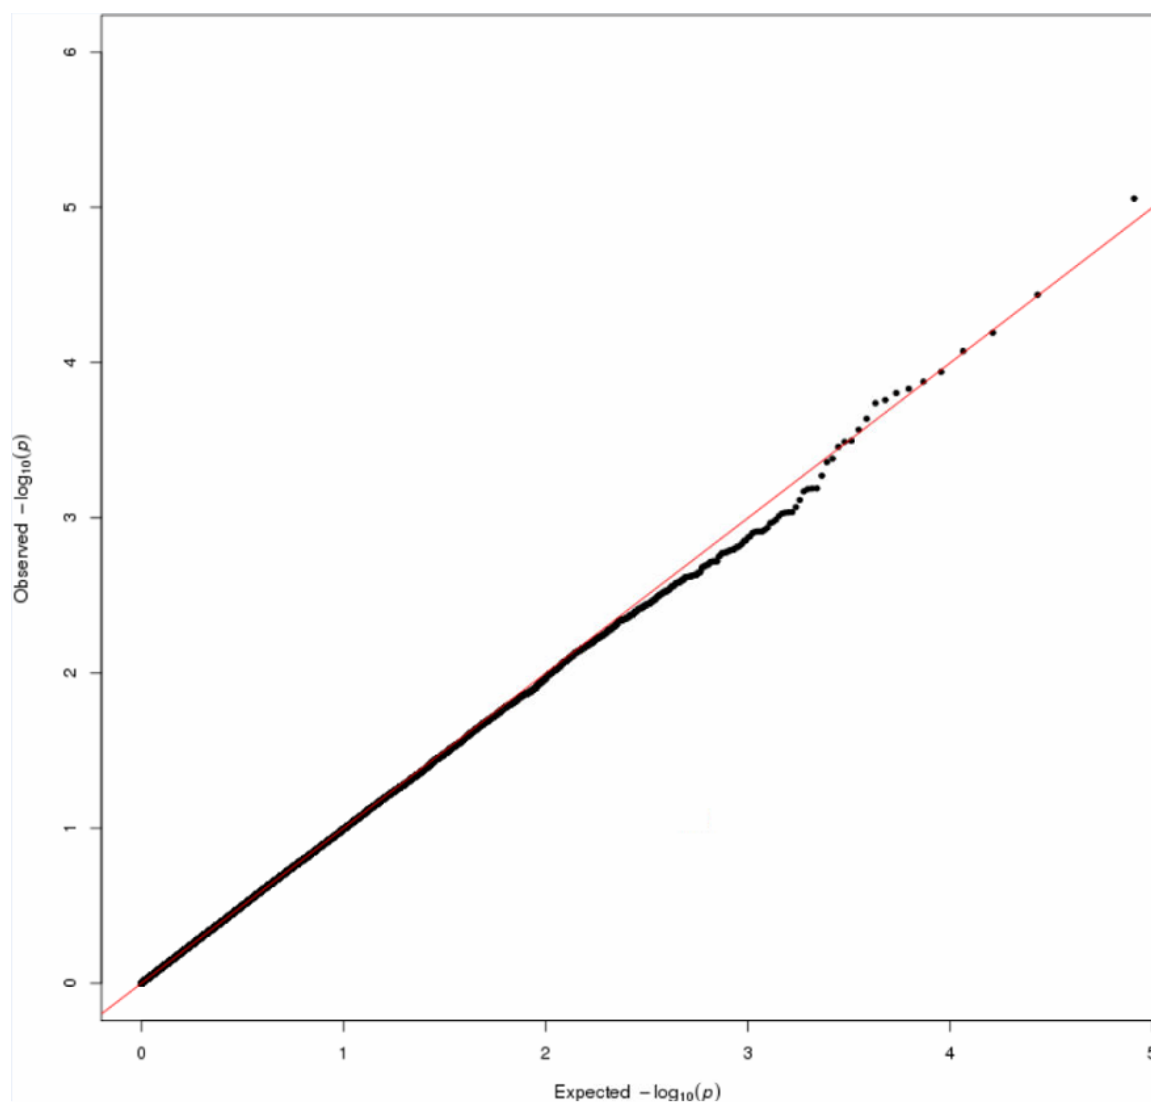

**Figure S2.** Quantile–quantile plot for dementia in Parkinson's disease.

**Table S1.** Characteristics of the markers used in the microarray.

| Source                                    | Not Design | Design | Submit | Design Rate (%) |
|-------------------------------------------|------------|--------|--------|-----------------|
| AD (PMID:30820047)                        | 689        | 244    | 933    | 26.2            |
| AD_IGAP                                   | 9754       | 6474   | 16,228 | 39.9            |
| ADPD_cRE                                  | 5412       | 533    | 5945   | 9.0             |
| DLB (PMID:31065058)                       | 2          | 1      | 3      | 33.3            |
| ENDOSOME                                  | 451        | 714    | 1165   | 61.3            |
| GWAS_cat_AD                               | 2827       | 2319   | 5146   | 45.1            |
| GWAS_cat_DM                               | 484        | 332    | 816    | 40.7            |
| GWAS_cat_PD                               | 1356       | 1183   | 2539   | 46.6            |
| GWAS_cat_T2D                              | 6248       | 5261   | 11,509 | 45.7            |
| KEGG_LYSOSOME                             | 946        | 1289   | 2235   | 57.7            |
| KEGG_TOLL_LIKE_RECEPTOR_SIGNALING_PATHWAY | 817        | 1166   | 1983   | 58.8            |
| MITOCHONDRION                             | 2389       | 3458   | 5847   | 59.1            |
| NEURON_DEVELOPMENT                        | 423        | 715    | 1138   | 62.8            |
| PD (Nall_2019_Biorxiv)                    | 663        | 615    | 1278   | 48.1            |

|                                             |         |         |         |      |
|---------------------------------------------|---------|---------|---------|------|
| PD (PMID:28892059)                          | 6       | 6       | 12      | 50.0 |
| PD_Foo                                      | 3681    | 3604    | 7285    | 49.5 |
| PD_Nall                                     | 13158   | 10,132  | 23,290  | 43.5 |
| REACTOME_ACTIVATION_OF_NF_KAPPAB_IN_B_CELLS | 378     | 545     | 923     | 59.0 |
| SLEEP                                       | 142     | 282     | 424     | 66.5 |
| SLEEP (PMID:18820697)                       | 3       | 6       | 9       | 66.7 |
| SLEEP (PMID:19412176)                       | 5       | 5       | 10      | 50.0 |
| SLEEP (PMID:21170044)                       | 4       | 3       | 7       | 42.9 |
| SLEEP (PMID:22257907)                       | 7       | 4       | 11      | 36.4 |
| SLEEP (PMID:26507264)                       | 34      | 50      | 84      | 59.5 |
| SLEEP (PMID:29535854)                       | 139     | 107     | 246     | 43.5 |
| T2D (PMID:30718926)                         | 9       | 2       | 11      | 18.2 |
| T2D_Xue                                     | 9223    | 8059    | 17,282  | 46.6 |
| UBIQUITIN_CYCLE                             | 262     | 426     | 688     | 61.9 |
| Other_GWAS_cat                              | 50,292  | 61,726  | 112,018 | 55.1 |
| Total                                       | 109,804 | 109,261 | 219,065 | 49.9 |

**Table S2.** Staged verification of the markers.

| Step-by-step Marker Check for Tagging |                       |                   |                     |
|---------------------------------------|-----------------------|-------------------|---------------------|
| Steps                                 | Description           | Number of Markers | Number of QC Marker |
| Step0                                 | Raw                   | 219,065           | -                   |
| Step1                                 | Remove duple Marker   | 179,344           | 39,721              |
| Step2                                 | 1000genome            | 165,822           | 13,522              |
| Step3                                 | MAF = 0               | 151,641           | 14,181              |
| Step4                                 | Tagging $r^2$ 0.8     | 59,920            | 91,721              |
| Tagging SNP Coverage                  |                       |                   |                     |
| Step4                                 | Tagging $r^2$ 0.8     | 59,920            | 14,811              |
| Step5-1                               | independent Marker    | 45,109            | -                   |
| Step6-1                               | Design Possible       | 32,379            | 12,730              |
| Step5-2                               | Non Independent Group | 14,807            | -                   |
| Step6-2                               | Design Possible Group | 13,880            | 927                 |
| Step7                                 | Final Tagging SNP     | 46,259            | -                   |

**Table S3.** Additional selection according to selection priority.

|       | Description                                            | Number of Markers | Cumulative Numbers | Priority |
|-------|--------------------------------------------------------|-------------------|--------------------|----------|
| Step0 | Tagging SNP                                            | 46,259            | 46,259             | Top      |
| Step1 | Priority1 Uniq Marker                                  | 12,088            | 58,347             | Middle   |
| Step2 | Priority2 Uniq Marker                                  | 15,210            | 73,557             | Bottom   |
| Step3 | Includes markers of interest and multi-allelic markers | 667               | 74,224             | Top      |
